# Supplementary material
Source: HighWire-hosted journal article supplement (http://www.jneurosci.org/highwire/filestream/599689/field_highwire_adjunct_files/3/Figure_S4.pdf)
Supplement: Figure_S4.pdf [file Figure_S4.pdf]

## Supplemental Figure 4

### Comparison of motor behavior of mice genetically altered at a single locus (P23)

| Parameter                      | GluR1 <sup>+/+</sup><br>(N=10) | Hb9-Cre<br>(N=16) | GluR1 <sup>Loxp/LoxP</sup><br>(N=11) | $F_{(2,34)} \cdot p$ |
|--------------------------------|--------------------------------|-------------------|--------------------------------------|----------------------|
| Rota rod (sec.)                | 335 ± 85                       | 326 ± 125         | 328 ± 101                            | 0.02197; 0.9783      |
| Treadmill (min).               | 79 ± 18                        | 77 ± 17           | 75 ± 14                              | 0.1390; 0.8707       |
| Grip Strength (fore limb, Kg.) | 0.065 ± 0.006                  | 0.064 ± 0.011     | 0.066 ± 0.009                        | 0.5005; 0.6106       |
| Grip Strength (hind limb, Kg.) | 0.025 ± 0.004                  | 0.025 ± 0.007     | 0.027 ± 0.006                        | 0.2830; 0.7553       |
